# Supplementary material
Source: Springer Nature journal article supplement (https://www.springermedizin.de/resource/supplementary/13048_2013_194_MOESM5_ESM.pdf/9665082)

**A**

Ctrl.

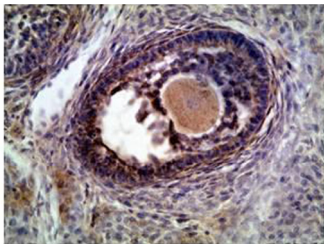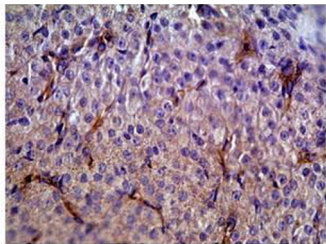

OHSS

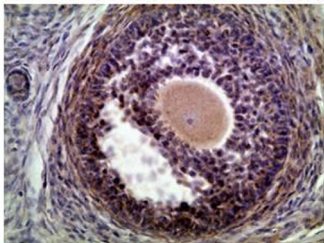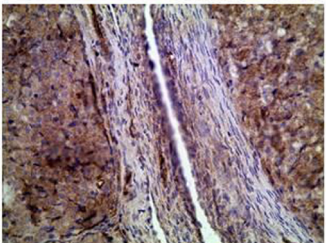

OHSS+M

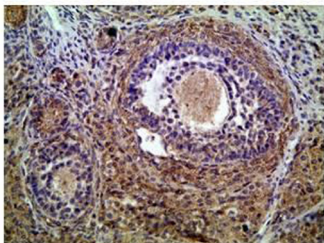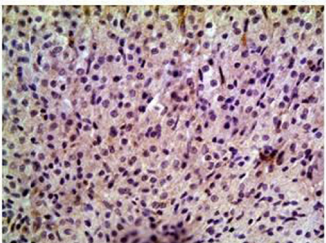**B**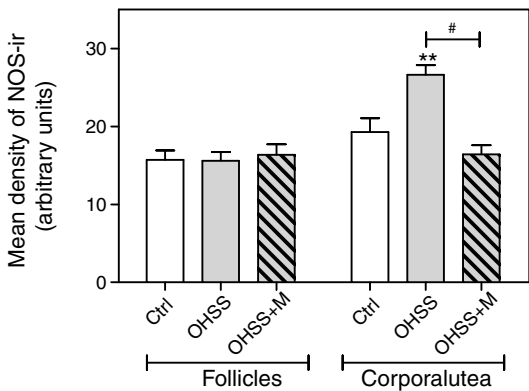

Supplement: MOESM5 [file 9665082]
